# Supplementary material for: G-tube contrast check: Transition from fluoroscopy to abdominal radiographs
Source: PubMed Central journal article supplement (PMC11703343; doi:10.21203/rs.3.rs-5632134/v1), 2024-12-24
Supplement: NIHPPRS5632134v1-supplement-1.pdf [file NIHPPRS5632134v1-supplement-1.pdf]

## Supplementary Files

This is a list of supplementary files associated with this preprint. Click to download.

- [Table1.docx](#)
- [Table2.docx](#)
- [Table3.tif](#)
- [Table4.docx](#)
